# Supplementary material
Source: publisher figshare collection journal article supplement (https://frontiersin.figshare.com/ndownloader/files/23043812)
Supplement: Supplementary file 1 [file 23043812]

## Sheet: FEG-EPMA (15 kV)
	Session 13-15 October 2017: Filtered (i.e., removed analysis spots) and Normalised (to 100%, on the volatile-free basis) Data
	Analysis Spot #	SiO2	TiO2	Al2O3	FeOTOT	MnO	MgO	CaO	Na2O	K2O	P2O5	Original Total	File Name	H2O	Analysis spot considered for average & standard deviation
	1	79.0439	0.113573	13.2847	0.402896	0.0420319	0.191539	1.88381	1.70959	3.32117	0.00664235	91.835	Exp01_750P_F60_01	8.165
	2	78.3653	0.107457	12.8068	0.992448	0.0341372	0.169505	1.73907	2.40463	3.37078	0.00976882	93.1535	Exp01_750P_F60_02	6.8465
	3	78.3953	0.0907598	12.8838	0.898403	0.0477057	0.162481	1.74164	2.36906	3.40755	0.00324529	92.4418	Exp01_750P_F60_03	7.5582
	4	78.4365	0.116056	12.8677	0.72008	0.0575465	0.170179	1.74351	2.48156	3.39075	0.0159376	93.4896	Exp01_750P_F60_04	6.5104
	5	78.2877	0.117037	12.8452	0.830246	0.0403281	0.164833	1.76035	2.53918	3.39268	0.0222978	93.7312	Exp01_750P_F60_05	6.2688
	6	78.2423	0.108507	12.9246	0.719671	0.0591174	0.1719	1.78528	2.50153	3.44228	0.0447924	93.5427	Exp01_750P_F60_06	6.4573
	7	78.0119	0.123718	12.6503	1.04619	0.0453096	0.355729	1.81024	2.52791	3.40626	0.022387	93.3576	Exp01_750P_F60_07	6.6424
	8	78.553	0.0971602	12.9297	0.519223	0.0423134	0.16604	1.76752	2.45311	3.44935	0.0224957	93.351	Exp01_750P_F60_08	6.649
	9	78.6319	0.110447	12.8676	0.497226	0.0399969	0.165456	1.73713	2.48774	3.42064	0.0417126	93.2573	Exp01_750P_F60_09	6.7427
	10	78.3642	0.126172	12.8855	0.678177	0.041521	0.165548	1.72736	2.54276	3.46545	0.00321868	93.2058	Exp01_750P_F60_10	6.7942
	11	78.625	0.129537	12.8462	0.441715	0.0470847	0.170494	1.76299	2.55849	3.41848	0	93.0238	Exp01_750P_F60_11	6.9762
	12	79.2978	0.110209	12.8995	0.578022	0.0502438	0.234398	1.80222	1.54008	3.45153	0.035826	91.5536	Exp01_750P_F60_12	8.4464
	Average	78.5212	0.112553	12.891	0.693692	0.0456114	0.190675	1.77176	2.34297	3.41141	0.019027		Average	6.65417
	Stand. Dev.	0.352152	0.011266	0.143969	0.214508	0.00728934	0.0556942	0.0440226	0.342024	0.040079	0.015387		Stand. Dev.	0.216865
	1	79.6764	0.127399	12.9821	0.373497	0.048559	0.15823	1.7838	1.31087	3.51255	0.0264267	90.8173	Exp01_750P_F70_01	9.1827
	2	78.9375	0.116499	12.9395	0.585774	0.0731125	0.158793	1.72672	1.99994	3.44252	0.0195622	91.5028	Exp01_750P_F70_02	8.4972
	3	79.0213	0.123733	12.9462	0.738098	0.0723885	0.189841	1.76289	1.7078	3.43763	0	90.7603	Exp01_750P_F70_03	9.2397
	4	79.1045	0.109461	12.9071	0.603255	0.0604916	0.184909	1.77265	1.77265	3.44559	0.0393306	90.2604	Exp01_750P_F70_04	9.7396
	6	76.4395	0.240044	12.3035	1.65434	0.103753	1.20614	2.57464	2.18023	3.29773	0	91.2748	Exp01_750P_F70_06	8.7252
	7	78.7383	0.126743	12.8057	0.800408	0.0468446	0.258193	1.78404	1.95916	3.48051	0	91.3659	Exp01_750P_F70_07	8.6341
	8	78.1498	0.111408	12.8514	0.845975	0.0854199	0.208999	1.80928	2.37947	3.5418	0.0163383	91.1966	Exp01_750P_F70_08	8.8034
	9	78.4244	0.116025	12.9383	0.541265	0.0638081	0.161066	1.72216	2.48388	3.53263	0.0164488	90.5841	Exp01_750P_F70_09	9.4159
	10	78.2305	0.118026	12.8696	0.726231	0.0510648	0.164518	1.68764	2.49336	3.6366	0.0224293	91.844	Exp01_750P_F70_10	8.156
	11	78.9294	0.129904	13.0989	0.71339	0.0647354	0.329858	1.72411	1.74579	3.26388	0	92.2216	Exp01_750P_F70_11	7.7784
	12	78.8107	0.103878	12.9848	0.737581	0.0624792	0.162881	1.70595	1.93414	3.48797	0.00956204	92.0306	Exp01_750P_F70_12	7.9694
	Average	78.5875	0.129375	12.8752	0.756347	0.0666051	0.289402	1.82308	1.99703	3.46176	0.0136453		Average	7.7784
	Stand. Dev.	0.831433	0.0375938	0.204918	0.326371	0.0168318	0.30865	0.252111	0.365585	0.106251	0.0130837		Stand. Dev.	-
	14	77.6649	0.173066	12.572	1.29703	0.0754748	0.864578	1.83587	2.24384	3.26377	0.00944777	93.1437	Exp01_750P_F80_02	6.8563
	15	78.5537	0.120046	12.5448	0.824759	0.0597526	0.61784	1.78285	2.18265	3.28477	0.0288498	92.5482	Exp01_750P_F80_03	7.4518
	Average	78.1093	0.146556	12.5584	1.06089	0.0676137	0.741209	1.80936	2.21325	3.27427	0.0191488		Average	6.8563
	Stand. Dev.	0.62842	0.0374911	0.0192034	0.333944	0.0111172	0.17447	0.0374895	0.0432737	0.0148497	0.0137193		Stand. Dev.	-
	19	79.2977	0.116285	12.9971	0.749761	0.0361032	0.192263	1.61656	1.78899	3.17924	0.025865	92.7896	Exp01_750C_F60_02	7.2104
	20	78.8891	0.111055	12.8967	0.630071	0.044943	0.171088	1.65008	2.10603	3.48471	0.0161752	92.1166	Exp01_750C_F60_03	7.8834
	21	79.1709	0.111979	13.0205	0.634109	0.0422376	0.174626	1.69169	1.80083	3.33971	0.0133152	91.6246	Exp01_750C_F60_04	8.3754
	22	78.7298	0.0915739	12.8549	0.49052	0.0677885	0.229746	1.71904	2.37854	3.43808	0	92.4936	Exp01_750C_F60_05	7.5064
	27	77.5771	0.127082	13.1582	1.0971	0.0773686	0.15364	1.89855	2.44726	3.4569	0.00669431	91.1222	Exp01_750C_F60_10	8.8778
	29	78.3377	0.128448	12.8337	0.965344	0.0609134	0.159015	1.67732	2.28425	3.55328	0	90.6205	Exp01_750C_F60_12	9.3795
	Average	78.6671	0.114404	12.9602	0.761151	0.0548924	0.180063	1.70887	2.13432	3.40865	0.0103416		Average	7.2104
	Stand. Dev.	0.632641	0.013415	0.122713	0.228582	0.0162475	0.0278156	0.099347	0.286819	0.132121	0.0101099		Stand. Dev.	-
	31	79.3803	0.119192	13.0459	0.956961	0.0426396	0.187901	1.82268	1.15922	3.22559	0.0594303	90.5262	Exp01_750C_F70_01	9.4738
	32	78.851	0.114282	13.0702	0.824216	0.0308571	0.168833	1.80735	1.88449	3.22898	0.0197265	90.7408	Exp01_750C_F70_02	9.2592
	33	78.3006	0.139423	12.8999	0.936437	0.0598303	0.2985	1.81337	2.19342	3.35527	0.00325755	92.0938	Exp01_750C_F70_03	7.9062
	34	77.554	0.140002	13.6101	0.923344	0.0389016	0.199276	2.15638	2.17806	3.19665	0.00325083	92.2841	Exp01_750C_F70_04	7.7159
	35	78.7801	0.120819	13.1157	0.815906	0.0489953	0.214933	1.69061	2.00288	3.18738	0.0226132	92.8661	Exp01_750C_F70_05	7.1339
	Average	78.5732	0.126744	13.1484	0.891373	0.0442448	0.213889	1.85808	1.88361	3.23877	0.0216557		Average	7.1339
	Stand. Dev.	0.686391	0.012083	0.270486	0.066257	0.0109068	0.0501973	0.175257	0.424748	0.0675603	0.0229608		Stand. Dev.	-
	41	78.7438	0.119863	13.0464	0.627224	0.0103852	0.233668	1.61187	1.95805	3.61319	0.0354829	92.439	Exp01_750C_F80_01	7.561
	42	78.2321	0.123564	12.9058	0.690645	0.019822	0.21858	1.62669	2.49929	3.67353	0.00980326	92.8263	Exp01_750C_F80_02	7.1737
	43	78.4028	0.126985	12.9467	0.658014	0.0317193	0.227538	1.61833	2.37355	3.61428	0	92.688	Exp01_750C_F80_03	7.312
	44	78.7094	0.123617	12.99	0.330981	0.0223182	0.189704	1.67928	2.30765	3.64024	0.00660878	92.3015	Exp01_750C_F80_04	7.6985
	45	78.0716	0.115394	12.9832	0.939316	0.0276903	0.247381	1.61617	2.3596	3.62021	0.0192863	92.8122	Exp01_750C_F80_05	7.1878
	46	78.1988	0.119171	13.0905	0.675627	0.0531803	0.188284	1.61479	2.40065	3.64942	0.00947342	92.8915	Exp01_750C_F80_06	7.1085
	47	78.1773	0.111495	12.9008	0.897838	0.0227342	0.225493	1.63164	2.33869	3.65488	0.0389418	91.932	Exp01_750C_F80_07	8.068
	48	78.3701	0.111527	12.9612	0.840433	0.0303576	0.212719	1.67936	2.13149	3.62785	0.034879	92.8926	Exp01_750C_F80_08	7.1074
	49	78.0016	0.116719	12.9349	1.06256	0.0415921	0.264578	1.61142	2.33003	3.63659	0	91.8443	Exp01_750C_F80_09	8.1557
	50	78.3698	0.107779	13.017	0.744808	0.0219628	0.265161	1.62846	2.43198	3.40692	0.00610674	93.3395	Exp01_750C_F80_10	6.6605
	Average	78.3277	0.117611	12.9777	0.746744	0.0281762	0.227311	1.6318	2.3131	3.61371	0.0160582		Average	7.01253
	Stand. Dev.	0.246845	0.00617964	0.0608489	0.203212	0.012072	0.0268629	0.0259932	0.157161	0.0751156	0.0151003		Stand. Dev.	0.236722
	51	79.6033	0.273699	10.7068	1.43666	0.0762371	1.01457	2.66358	2.19169	2.0239	0.00954275	95.3604	Exp01_800P_F60_01	4.6396
	54	80.5125	0.24512	10.0876	1.3028	0.0738503	0.949369	2.25217	2.51405	2.05314	0.00921819	95.4634	Exp01_800P_F60_04	4.5366
	63	78.046	0.362626	11.6397	1.32466	0.0823913	0.971167	2.58194	2.80235	2.18311	0.00598255	95.2771	Exp01_800P_F60_13	4.7229
	64	77.6732	0.360364	11.9661	1.23114	0.0895861	1.03008	2.65677	2.76304	2.18917	0.0405954	94.0994	Exp01_800P_F60_14	5.9006
	65	77.3821	0.355968	12.1773	1.14923	0.0882566	1.02945	2.76327	2.83682	2.19591	0.0216439	95.177	Exp01_800P_F60_15	4.823
	66	77.4822	0.406639	12.2657	0.786232	0.0801868	1.03429	2.8208	2.89475	2.22917	0	94.654	Exp01_800P_F60_16	5.346
	67	77.0943	0.402553	12.1926	1.30441	0.103433	1.022	2.8627	2.8209	2.19404	0.00313434	95.714	Exp01_800P_F60_17	4.286
	Average	78.2562	0.343853	11.5765	1.2193	0.0848488	1.00728	2.65732	2.68909	2.15263	0.0128739		Average	4.89353
	Stand. Dev.	1.29118	0.061684	0.850931	0.210222	0.0100194	0.0333389	0.204123	0.250946	0.0797698	0.0140115		Stand. Dev.	0.549845
	71	76.942	0.310764	12.4263	1.29991	0.0728913	1.04706	2.66881	2.25741	2.94308	0.031646	94.7987	Exp01_800P_F70_01	5.2013
	72	75.3513	0.3155	12.8939	1.50639	0.0735289	1.20027	3.06546	2.7389	2.85477	0	94.9287	Exp01_800P_F70_02	5.0713
	73	75.0049	0.354622	13.0512	1.63008	0.0696204	1.15757	3.08139	2.76589	2.88157	0.003155	95.0871	Exp01_800P_F70_03	4.9129
	74	74.8805	0.333486	12.8698	2.06668	0.0838152	1.1754	2.99564	2.72426	2.87038	0	95.806	Exp01_800P_F70_04	4.194
	75	75.7806	0.329828	12.7123	1.53262	0.072432	1.10076	2.91827	2.66634	2.85529	0.0313872	95.2618	Exp01_800P_F70_05	4.7382
	76	75.665	0.309644	12.6563	1.74063	0.0601881	1.08748	2.81018	2.70532	2.91503	0.0501218	95.3677	Exp01_800P_F70_06	4.6323
	77	75.9707	0.300976	12.5846	1.57965	0.0531816	1.07974	2.84337	2.67488	2.90656	0.00642391	94.9577	Exp01_800P_F70_07	5.0423
	78	76.59	0.30716	12.4126	1.2704	0.0623786	1.04718	2.70342	2.70342	2.90329	0	95.0646	Exp01_800P_F70_08	4.9354
	79	77.2048	0.308798	11.8873	1.68473	0.0610062	0.994726	2.32305	2.6579	2.87765	0	95.564	Exp01_800P_F70_09	4.436
	80	76.5191	0.307016	12.1407	1.83729	0.0834089	1.03285	2.5576	2.65155	2.83945	0.0308999	95.7931	Exp01_800P_F70_10	4.2069
	81	77.221	0.298044	11.9931	1.41526	0.0669892	1.00023	2.48458	2.61038	2.90391	0.0063949	95.3885	Exp01_800P_F70_11	4.6115
	82	78.1077	0.295416	11.4901	1.60108	0.0643573	0.938465	2.05106	2.55336	2.8673	0.0310799	95.5603	Exp01_800P_F70_12	4.4397
	83	78.0862	0.29108	11.5971	1.33041	0.0587193	0.945381	2.17052	2.60043	2.90451	0.0156235	95.369	Exp01_800P_F70_13	4.631
	84	79.2892	0.308719	10.678	1.42373	0.0533899	0.873815	2.07278	2.43919	2.85793	0.00314058	95.5237	Exp01_800P_F70_14	4.4763
	85	78.6887	0.281577	11.3281	1.07737	0.0552256	0.91924	2.19016	2.58837	2.87131	0	95.4267	Exp01_800P_F70_15	4.5733
	Average	76.7535	0.310175	12.1814	1.53308	0.0660755	1.04001	2.59575	2.62251	2.88347	0.0139915		Average	4.67349
	Stand. Dev.	1.35225	0.0181055	0.678905	0.24759	0.0098087	0.0965893	0.363349	0.130412	0.0282351	0.0165383		Stand. Dev.	0.306816
	88	75.468	0.573075	13.8097	1.82352	0.131059	0.751268	2.37804	2.29273	2.7726	0	93.7748	Exp01_800P_F80_03	6.2252
	89	76.154	0.564355	13.4738	1.8205	0.0762069	0.625003	2.18036	2.29679	2.78367	0.0252965	94.4796	Exp01_800P_F80_04	5.5204
	90	75.6966	0.441219	13.8602	1.81062	0.107684	0.737907	2.18121	2.32945	2.78475	0.050295	94.4428	Exp01_800P_F80_05	5.5572
	Average	75.7729	0.526216	13.7146	1.81821	0.104983	0.704726	2.24654	2.30632	2.78034	0.0251972		Average	5.7676
	Stand. Dev.	0.349287	0.0737385	0.210039	0.00674615	0.0275254	0.0693648	0.113882	0.0201328	0.00672618	0.0251476		Stand. Dev.	0.39672
	91	76.7163	0.337255	12.5796	1.57774	0.127914	1.09012	3.28255	2.21307	2.07542	0	94.4388	Exp01_800C_F60_01	5.5612
	92	74.5508	0.358451	13.2546	2.11655	0.111486	1.2144	3.69872	2.68236	1.99082	0.0217942	95.4383	Exp01_800C_F60_02	4.5617
	93	76.8725	0.306191	11.8435	2.16763	0.0874384	1.07837	2.95301	2.63886	2.05245	0	95.4958	Exp01_800C_F60_03	4.5042
	94	74.3974	0.358822	13.3755	2.06426	0.100474	1.19369	3.86521	2.65404	1.99053	0	94.9495	Exp01_800C_F60_04	5.0505
	95	76.2434	0.320515	12.4352	1.611	0.10582	1.12464	3.44311	2.64288	2.06376	0.00958175	94.9722	Exp01_800C_F60_05	5.0278
	96	76.8514	0.313752	12.1256	1.67068	0.0830087	1.10328	3.28883	2.56381	1.99641	0.00315223	95.1707	Exp01_800C_F60_06	4.8293
	97	74.8532	0.346033	13.2557	1.75273	0.121747	1.17979	3.8833	2.65534	1.95215	0	95.2798	Exp01_800C_F60_07	4.7202
	98	76.6957	0.323013	12.2511	1.44193	0.0826213	1.12965	3.52588	2.53653	2.01028	0.0031575	95.0118	Exp01_800C_F60_08	4.9882
	99	75.3995	0.332719	12.8849	1.78373	0.103981	1.13299	3.81929	2.56018	1.95161	0.031058	95.3057	Exp01_800C_F60_09	4.6943
	100	74.6522	0.366984	13.1394	2.0295	0.122816	1.17345	3.95439	2.59441	1.96673	0	95.59	Exp01_800C_F60_10	4.41
	Average	75.7232	0.336374	12.7145	1.82158	0.104731	1.14204	3.57143	2.57415	2.00502	0.00687436		Average	4.83474
	Stand. Dev.	1.05079	0.020786	0.542391	0.255118	0.0165974	0.0460721	0.328662	0.135851	0.0450715	0.010948		Stand. Dev.	0.338658
	101	76.2634	0.290642	12.9174	1.48319	0.100562	1.13964	3.10313	2.20901	2.49302	0	95.0653	Exp01_800C_F70_01	4.9347
	102	75.875	0.288185	12.8012	1.6342	0.107375	1.11251	3.10079	2.60843	2.47225	0	95.4596	Exp01_800C_F70_02	4.5404
	103	75.9423	0.301085	12.8003	1.56204	0.130519	1.10664	3.02972	2.61039	2.49507	0.0219105	95.3882	Exp01_800C_F70_03	4.6118
	104	76.3035	0.308248	12.7576	1.26238	0.0813286	1.08982	3.03402	2.62316	2.51781	0.0220177	94.9236	Exp01_800C_F70_04	5.0764
	105	75.4356	0.317871	12.8759	1.84091	0.109513	1.11187	3.19022	2.63585	2.47896	0.00313792	95.6047	Exp01_800C_F70_05	4.3953
	106	75.8078	0.302624	12.8948	1.62363	0.122663	1.06741	3.12156	2.58733	2.47211	0	95.4651	Exp01_800C_F70_06	4.5349
	107	75.6088	0.295293	12.6763	2.06747	0.124988	1.11612	3.03855	2.6	2.45381	0.0185863	95.7693	Exp01_800C_F70_07	4.2307
	108	75.7506	0.305256	12.686	2.00305	0.0967096	1.09093	2.97327	2.629	2.46208	0.00312976	95.854	Exp01_800C_F70_08	4.146
	109	76.0978	0.291202	12.7807	1.61198	0.106139	1.04402	3.01461	2.58544	2.44937	0.0187366	95.5349	Exp01_800C_F70_09	4.4651
	110	76.5049	0.294936	12.6476	1.43794	0.112306	1.03616	2.87589	2.5715	2.48754	0.0311729	95.275	Exp01_800C_F70_10	4.725
	111	76.6149	0.304865	12.4107	1.57363	0.107951	0.999256	2.84303	2.58076	2.54928	0.0155265	95.3209	Exp01_800C_F70_11	4.6791
	112	76.5046	0.295169	12.3923	1.76283	0.117942	0.997467	2.75967	2.58128	2.5603	0.0283312	95.3014	Exp01_800C_F70_12	4.6986
	113	77.0021	0.294964	12.455	1.29178	0.112032	1.01765	2.77713	2.53518	2.51414	0	95.0623	Exp01_800C_F70_13	4.9377
	114	77.1223	0.285195	12.2661	1.6159	0.0823687	0.954952	2.61271	2.50779	2.51828	0.0343115	95.3032	Exp01_800C_F70_14	4.6968
	115	77.1362	0.331586	12.0025	1.96899	0.128299	0.930348	2.47171	2.50313	2.52408	0.00314201	95.4804	Exp01_800C_F70_15	4.5196
	116	77.3293	0.329125	11.9226	1.96618	0.0835625	0.904232	2.42634	2.53093	2.48909	0.0187205	95.6171	Exp01_800C_F70_16	4.3829
	Average	76.3312	0.302265	12.5804	1.66913	0.107766	1.04494	2.89827	2.5562	2.49607	0.0136702		Average	4.59844
	Stand. Dev.	0.589634	0.0137377	0.309702	0.246637	0.0157267	0.0719778	0.233276	0.101254	0.0323754	0.0122314		Stand. Dev.	0.252729
	117	74.0672	0.308781	14.9468	1.57725	0.0884953	0.697589	3.17567	2.36058	2.75225	0.0252995	94.4683	Exp01_800C_F80_01	5.5317
	119	76.9002	0.314787	12.7172	1.39323	0.0816037	0.725843	2.56648	2.67124	2.62933	0	95.4614	Exp01_800C_F80_03	4.5386
	Average	75.4837	0.311784	13.832	1.48524	0.0850495	0.711716	2.87108	2.51591	2.69079	0.0126497		Average	5.03515
	Stand. Dev.	2.00325	0.00424695	1.57659	0.130119	0.00487312	0.019979	0.43076	0.219667	0.0869112	0.0178894		Stand. Dev.	0.702228
	123	79.9995	0.276064	12.0074	0.927574	0.114928	0.216026	2.45509	2.0477	1.92977	0.0258374	93.2756	Exp01_850P_F60_01	6.7244
	125	77.9333	0.246599	13.2571	0.860432	0.126816	0.212923	3.05851	2.46173	1.801	0.041455	93.8366	Exp01_850P_F60_03	6.1634
	127	77.3384	0.281067	13.3276	0.998407	0.136243	0.205953	3.14651	2.73333	1.80103	0.0314651	94.3904	Exp01_850P_F60_05	5.6096
	129	77.5357	0.280047	13.3105	0.764309	0.0937421	0.215049	3.23914	2.68141	1.84481	0.0351801	93.2345	Exp01_850P_F60_07	6.7655
	130	81.7742	0.232625	10.7137	0.734684	0.116472	0.190937	2.15335	2.32307	1.76087	0	94.2718	Exp01_850P_F60_08	5.7282
	132	79.1414	0.261622	12.1095	1.00612	0.120881	0.223511	2.47988	2.68385	1.95384	0.0192164	93.1497	Exp01_850P_F60_10	6.8503
	134	80.0039	0.254297	11.5368	0.983439	0.134366	0.215028	2.3774	2.62151	1.85735	0.015814	94.2204	Exp01_850P_F60_12	6.86
	135	81.7428	0.25117	10.553	0.828045	0.108962	0.197118	2.25216	2.34868	1.70521	0.0127623	93.2437	Exp01_850P_F60_13	6.21
	136	78.7236	0.264059	11.8519	1.33513	0.183765	0.800636	2.52636	2.43849	1.85632	0.0196617	91.0401	Exp01_850P_F60_14	5.83
	137	78.9167	0.243052	12.1419	1.12648	0.13516	0.175633	2.57652	2.70535	1.95386	0.0254431	93.1489	Exp01_850P_F60_15	6.82
	138	79.3354	0.234705	12.117	0.847326	0.109558	0.203634	2.53736	2.63412	1.94602	0.0349424	93.0102	Exp01_850P_F60_16	6.35
	139	79.037	0.238337	12.2017	0.910882	0.124275	0.197593	2.6231	2.67685	1.94582	0.0443992	93.0197	Exp01_850P_F60_17	7.29
	140	79.1493	0.261962	12.1976	0.880144	0.117338	0.200273	2.56677	2.66383	1.96282	0	92.7235	Exp01_850P_F60_18	6.38
	141	78.9558	0.237642	12.1727	1.07736	0.107197	0.195668	2.62612	2.61536	1.98035	0.0316426	92.9127	Exp01_850P_F60_19	6.71143
	Average	79.2562	0.254518	12.107	0.948594	0.12355	0.246427	2.61559	2.54538	1.87851	0.0241299		Average	6.38483
	Stand. Dev.	1.31825	0.0167368	0.833909	0.157739	0.0210943	0.159994	0.320058	0.196645	0.0870499	0.0137893		Stand. Dev.	0.449029
	142	80.0327	0.406606	11.7998	1.10933	0.0889014	0.299666	2.39432	1.94338	1.9219	0.00322106	93.1369	Exp01_850P_F70_01	6.8631
	143	79.4612	0.420922	11.7491	1.08653	0.0940357	0.273045	2.34556	2.60144	1.92976	0.0382753	93.7942	Exp01_850P_F70_02	6.2058
	144	77.2327	0.324201	13.3801	0.93894	0.0849527	0.235001	3.39811	2.66539	1.73091	0.00966337	94.17	Exp01_850P_F70_03	5.83
	145	78.5697	0.396336	11.7838	1.42737	0.134581	0.778829	2.5757	2.47912	1.83519	0.0192105	93.1784	Exp01_850P_F70_04	6.8216
	146	79.4888	0.385805	12.013	0.730712	0.119276	0.278702	2.43464	2.61617	1.93276	0	93.6484	Exp01_850P_F70_05	6.3516
	147	78.6545	0.673287	12.1347	0.966138	0.107972	0.368248	2.6966	2.53481	1.84448	0.0193077	92.7093	Exp01_850P_F70_06	7.2907
	148	75.8716	0.363603	14.057	1.02309	0.109273	0.435917	3.82402	2.63836	1.67702	0	93.6187	Exp01_850P_F70_07	6.3813
	Average	78.473	0.424394	12.4168	1.0403	0.10557	0.381344	2.80985	2.49695	1.83886	0.0128111		Average	6.4089
	Stand. Dev.	1.45998	0.114227	0.920857	0.211597	0.0177243	0.187748	0.573186	0.252222	0.101544	0.0139147		Stand. Dev.	0.389112
	163	79.235	0.293356	12.1562	0.819447	0.173079	0.243446	2.4848	2.5919	1.9707	0.0319168	93.3678	Exp01_850P_F80_03	6.6322
	164	79.9012	0.25738	11.8198	0.704154	0.148925	0.235539	2.39822	2.60164	1.89502	0.0381145	93.4028	Exp01_850P_F80_04	6.5972
	166	79.2649	0.286196	12.1938	0.746588	0.175159	0.24783	2.46868	2.66104	1.95571	0	93.5723	Exp01_850P_F80_06	6.4277
	171	78.849	0.284281	12.2548	1.04399	0.1663	0.247857	2.43184	2.69733	1.99645	0.0280352	94.1673	Exp01_850P_F80_11	5.8327
	176	79.2126	0.323541	12.2383	0.753219	0.160114	0.241881	2.46905	2.64006	1.94531	0.0159259	93.5584	Exp01_850P_F80_16	6.4416
	177	79.4089	0.285104	12.1161	0.755167	0.166838	0.233959	2.45539	2.61623	1.96217	0	93.2641	Exp01_850P_F80_17	6.7359
	Average	79.3119	0.28831	12.1298	0.803762	0.165069	0.241752	2.45133	2.6347	1.95423	0.0189987		Average	6.44455
	Stand. Dev.	0.343213	0.0212337	0.160311	0.12334	0.00954768	0.00594005	0.0314718	0.0397776	0.0337769	0.016403		Stand. Dev.	0.321886
	180	79.6327	0.274758	12.0889	0.743645	0.172714	0.210833	2.3878	2.54842	1.92737	0.0127421	93.3913	Exp01_850C_F60_02	6.6087
	181	79.2093	0.286388	12.073	1.25117	0.155012	0.197491	2.3848	2.55514	1.88441	0.00319392	93.9284	Exp01_850C_F60_03	6.0716
	182	79.0658	0.322715	12.0419	1.252	0.158856	0.208471	2.4382	2.56596	1.89519	0.0507869	93.9218	Exp01_850C_F60_04	6.0782
	183	79.1487	0.292691	12.1645	1.10394	0.16669	0.208443	2.41165	2.56038	1.90169	0.0413273	94.1266	Exp01_850C_F60_05	5.8734
	184	78.9351	0.304921	12.1905	1.28239	0.164949	0.206505	2.39133	2.57201	1.89181	0.0604741	94.0899	Exp01_850C_F60_06	5.9101
	185	79.4458	0.301999	12.1377	0.956151	0.161266	0.204256	2.37407	2.54517	1.86076	0.0127259	93.5103	Exp01_850C_F60_07	6.4897
	186	79.0118	0.264043	12.2973	1.18867	0.160437	0.176523	2.43406	2.55048	1.89434	0.0222241	94.4922	Exp01_850C_F60_08	5.5078
	187	79.5042	0.312311	12.0629	0.927532	0.159628	0.201832	2.38267	2.53225	1.89118	0.0253225	93.5925	Exp01_850C_F60_09	6.4075
	188	79.0162	0.251826	12.3838	0.955173	0.162139	0.195439	2.50018	2.60657	1.89375	0.0348961	93.9934	Exp01_850C_F60_10	6.0066
	189	79.2854	0.298122	12.0958	1.09322	0.191588	0.197145	2.40421	2.53243	1.90199	0	93.586	Exp01_850C_F60_11	6.414
	190	79.3233	0.240403	12.4131	0.788711	0.180329	0.193141	2.49769	2.44386	1.88404	0.0354199	92.8857	Exp01_850C_F60_12	7.1143
	191	79.1018	0.280079	12.1982	1.15728	0.190164	0.208701	2.42898	2.4929	1.90697	0.0349433	93.8664	Exp01_850C_F60_13	6.1336
	192	79.0416	0.2912	12.2261	1.15024	0.173435	0.213261	2.43024	2.55871	1.90565	0.00942119	93.4065	Exp01_850C_F60_14	6.5935
	193	79.3079	0.252994	12.2947	0.921942	0.182538	0.195661	2.474	2.43098	1.90391	0.0352814	92.9668	Exp01_850C_F60_15	7.0332
	194	79.0702	0.264209	12.4082	1.01769	0.188048	0.211474	2.48164	2.41746	1.89332	0.0478143	93.4866	Exp01_850C_F60_16	6.5134
	195	78.9775	0.297575	12.1455	1.32026	0.163996	0.203772	2.40357	2.53119	1.92498	0.0316931	94.0268	Exp01_850C_F60_17	5.9732
	196	79.1661	0.285412	12.1679	1.03673	0.177715	0.212511	2.45493	2.52964	1.92125	0.047711	93.6891	Exp01_850C_F60_18	6.3109
	197	79.2245	0.256706	12.1704	1.03257	0.175215	0.204684	2.38301	2.56387	1.92556	0.0634051	93.9987	Exp01_850C_F60_19	6.0013
	198	78.9125	0.284997	12.102	1.38945	0.160689	0.20513	2.40768	2.54556	1.88796	0.10405	94.2817	Exp01_850C_F60_20	5.7183
	199	79.5563	0.286228	12.2198	1.25902	0.173078	0.204266	2.45886	1.90535	1.90535	0.0317203	93.9461	Exp01_850C_F60_21	6.0539
	200	79.0785	0.266357	12.3032	1.09868	0.191667	0.203672	2.40115	2.51802	1.89117	0.0474917	94.1217	Exp01_850C_F60_22	5.8783
	Average	79.1912	0.281711	12.1993	1.09174	0.171912	0.20301	2.42527	2.5003	1.89965	0.0358402		Average	6.13389
	Stand. Dev.	0.207364	0.0215882	0.113031	0.171965	0.0118649	0.00842661	0.0394375	0.144355	0.0160489	0.0236021		Stand. Dev.	0.308484
	202	80.3456	0.256884	11.4703	0.885356	0.0559139	0.345282	2.41761	2.38566	1.78924	0.0480327	93.8944	Exp01_850C_F70_02	6.1056
	203	81.7178	0.250644	10.981	0.561523	0.0779331	0.35427	2.20686	2.22818	1.59917	0.0224951	93.7984	Exp01_850C_F70_03	6.2016
	205	83.1909	0.237388	9.5606	0.839885	0.0637024	0.296578	2.02546	2.21437	1.51123	0.0599243	95.2869	Exp01_850C_F70_05	4.7131
	206	79.0781	0.285005	12.219	0.932326	0.0985818	0.36806	2.50974	2.63736	1.87167	0	94.0336	Exp01_850C_F70_06	5.9664
	207	80.0236	0.282942	11.5214	0.974648	0.0740507	0.362297	2.44007	2.50372	1.78231	0.0349036	94.2597	Exp01_850C_F70_07	5.7403
	208	78.9366	0.278312	12.2014	0.895729	0.0918833	0.382865	2.53398	2.70433	1.95904	0.015864	93.9235	Exp01_850C_F70_08	6.0765
	211	79.2917	0.293712	12.1864	0.743787	0.0998622	0.438967	2.46718	2.52059	1.95452	0.00320414	93.629	Exp01_850C_F70_11	6.371
	214	79.1953	0.331869	12.1512	0.949535	0.0782058	0.356342	2.44726	2.62814	1.86204	0	93.9828	Exp01_850C_F70_14	6.0172
	215	81.9065	0.294585	10.4517	0.941914	0.0813376	0.318397	2.11773	2.26523	1.62254	0	94.9131	Exp01_850C_F70_15	5.0869
	216	78.8171	0.325765	11.6375	1.1821	0.137815	0.944866	2.5067	2.61337	1.83469	0	93.7487	Exp01_850C_F70_16	6.2513
	217	79.2182	0.315252	12.2005	0.863956	0.0779598	0.361217	2.50623	2.52756	1.91967	0.00938503	93.7663	Exp01_850C_F70_17	6.2337
	218	78.945	0.318455	12.1968	1.04644	0.0876813	0.337032	2.50518	2.62195	1.93196	0.00934135	94.2048	Exp01_850C_F70_18	5.7952
	219	78.8482	0.322846	12.124	1.19955	0.116993	0.356394	2.51609	2.55856	1.93219	0.0251609	94.1936	Exp01_850C_F70_19	5.8064
	Average	79.9627	0.29182	11.6078	0.924365	0.08784	0.401736	2.40001	2.493	1.8131	0.0175624		Average	5.87425
	Stand. Dev.	1.42738	0.0305164	0.830087	0.167824	0.0218835	0.166536	0.169097	0.166436	0.147756	0.0197548		Stand. Dev.	0.478333
	221	80.091	0.296359	11.9917	0.748138	0.172688	0.313735	2.4777	1.96286	1.91995	0.0258496	93.2315	Exp01_850C_F80_01	6.7685
	223	81.282	0.276376	10.7585	0.947195	0.156295	0.309731	2.22371	2.31901	1.70485	0.0222371	94.4367	Exp01_850C_F80_03	5.5633
	224	78.9234	0.317927	12.1257	1.06185	0.156039	0.316332	2.47832	2.65914	1.90395	0.0572248	94.0152	Exp01_850C_F80_04	5.9848
	226	78.4349	0.299545	11.7717	1.18617	0.226964	1.0781	2.47655	2.60521	1.87618	0.0445994	93.2748	Exp01_850C_F80_06	6.7252
	227	80.7233	0.275719	9.97259	1.58533	0.358199	1.17539	2.1102	2.24946	1.52106	0.0287073	93.3559	Exp01_850C_F80_07	6.6441
	228	79.5688	0.294529	11.9375	0.718174	0.179758	0.462081	2.46243	2.46243	1.895	0.0192712	93.4035	Exp01_850C_F80_08	6.5965
	229	80.8046	0.26066	11.2953	0.621981	0.169111	0.246038	2.33111	2.43707	1.78012	0.0539333	94.3758	Exp01_850C_F80_09	5.6242
	Average	79.9754	0.288731	11.4076	0.981263	0.202722	0.557345	2.36572	2.38503	1.80016	0.0359747		Average	6.27237
	Stand. Dev.	1.04981	0.0190224	0.791964	0.333463	0.0726345	0.395371	0.14917	0.235685	0.145647	0.0156606		Stand. Dev.	0.532298

## Sheet: FEG-EPMA (7 kV)
	Session 28 March 2018: Normalised (to 100%, on the volatile-free basis) Data
	Analysis Spot #	SiO2	TiO2	Al2O3	FeOTOT	MgO	CaO	Na2O	K2O	Original Total	File Name	H2O
	9	81.8222	0.163055	13.2574	2.11892	0.622873	1.79032	0	0.225037	88.2523	Exp01_750C_F60_01	11.7477
	10	81.7455	0.220838	12.9453	2.11488	0.672642	1.79208	0.0182547	0.490429	89.8398	Exp01_750C_F60_02	10.1602
	11	82.7895	0.18031	13.4539	1.0672	0.147426	1.722	0.00966544	0.62992	90.0114	Exp01_750C_F60_03	9.9886
	12	86.9427	0.121335	9.53503	0.733703	0.14324	1.31912	0.0833241	1.12155	93.1303	Exp01_750C_F60_04	6.8697
	13	82.7499	0.0842772	13.3885	1.284	0.183158	1.78364	0.0117052	0.514693	89.704	Exp01_750C_F60_05	10.296
	17	85.5282	0.321694	6.64577	2.98578	1.69558	2.29017	0.144259	0.38858	93.4429	Exp01_750C_F60_09	6.5571
	18	77.8562	0.262818	12.355	3.60537	2.37427	2.95684	0.215773	0.373727	90.9754	Exp01_750C_F60_10	9.0246
	19	83.7732	0.180752	13.0623	1.00545	0.182077	1.60104	0.0215313	0.173575	90.566	Exp01_750C_F60_11	9.434
	20	92.0817	0.168507	6.18033	0.598806	0.109661	0.783265	0	0.0776503	94.6551	Exp01_750C_F60_12	5.3449
	24	89.1518	0.0299599	8.16513	0.856705	0.115514	1.23163	0.0226809	0.426506	94.7934	Exp01_750C_F60_16	5.2066
	25	85.3102	0.0282942	12.1292	0.774909	0.119866	1.50124	0	0.136316	91.1849	Exp01_750C_F60_17	8.8151
	26	84.3906	0.151738	12.3927	0.812758	0.12771	1.7243	0.0139057	0.386243	89.8915	Exp01_750C_F60_18	10.1085
	27	81.7287	0.217352	13.6714	1.62954	0.441534	1.79729	0.0570339	0.45723	83.4591	Exp01_750C_F60_19	16.5409
	29	81.02	0.197348	13.9304	1.02518	0.167122	1.96034	0.0457777	1.65369	91.3108	Exp01_750C_F60_21	8.6892
	30	84.6	0.0535214	11.2267	0.900161	0.153421	1.5566	0.0594919	1.44998	93.7943	Exp01_750C_F60_22	6.2057
	31	87.7924	0.114429	9.55694	0.602977	0.0865634	1.2104	0.110721	0.52542	94.3817	Exp01_750C_F60_23	5.6183
	32	85.5078	0.0451156	11.3424	0.751609	0.142972	1.41934	0.125498	0.665084	94.4241	Exp01_750C_F60_24	5.5759
	33	86.4204	0.084205	9.74343	0.731072	0.165995	1.36324	0.158226	1.33342	95.2437	Exp01_750C_F60_25	4.7563
	36	67.9851	0.648605	11.3716	8.30019	5.16504	5.31382	0.532551	0.683145	94.0942	Exp01_750C_F60_28	5.9058
	37	81.2301	0.366342	11.6028	1.90018	0.757419	2.21865	0.278976	1.64541	94.2015	Exp01_750C_F60_29	5.7985
	38	81.4332	0.111485	13.218	1.16748	0.16211	1.7802	0.247226	1.88034	89.8774	Exp01_750C_F60_30	10.1226
	39	82.6387	0.0518671	13.5988	1.02961	0.137404	1.80881	0.216404	0.518453	91.773	Exp01_750C_F60_31	8.227
	40	80.9952	0.175424	13.772	1.26206	0.375231	2.41575	0.306935	0.697405	88.5855	Exp01_750C_F60_32	11.4145
	41	86.544	0.131915	9.07624	0.691444	0.139341	1.35638	0.22474	1.83587	96.9565	Exp01_750C_F60_33	3.0435
	42	83.5239	0.130738	10.9661	1.26084	0.322827	1.75291	0.216609	1.82594	95.8408	Exp01_750C_F60_34	4.1592
	43	84.0018	0.0742527	12.3054	0.904311	0.12073	1.68203	0.0486903	0.862703	90.3671	Exp01_750C_F60_35	9.6329
	45	82.3071	0.149262	13.9326	1.08753	0.174813	1.75795	0.0461872	0.544419	91.5838	Exp01_750C_F60_37	8.4162
	43	82.5312	0.179734	13.7139	1.05012	0.186946	1.70156	0.0819227	0.554528	88.7422	Exp01_750C_F60_35	11.2578
	44	83.7261	0.205173	13.0554	1.07824	0.198389	1.48447	0.0818467	0.170366	89.9242	Exp01_750C_F60_36	10.0758
	45	83.5245	0.240379	10.7812	1.70458	0.554695	1.76973	0.28435	1.14044	92.1047	Exp01_750C_F60_37	7.8953
	46	82.433	0.194399	13.6757	1.01609	0.208637	1.642	0.0615463	0.768525	87.0889	Exp01_750C_F60_38	12.9111
	47	84.2622	0.193886	12.4109	1.09181	0.600561	1.32653	0.0401814	0.073882	92.5801	Exp01_750C_F60_39	7.4199
	48	83.9555	0.174817	13.2732	1.02074	0.0819052	1.30196	0.0560063	0.135753	92.6681	Exp01_750C_F60_40	7.3319
	49	83.2584	0.0617727	13.5512	1.14533	0.19211	1.46142	0.0643601	0.26531	92.7594	Exp01_750C_F60_41	7.2406
	50	82.2946	0.23419	13.437	1.13465	0.17362	1.65092	0.17034	0.904617	91.4641	Exp01_750C_F60_42	8.5359
	51	83.4221	0.143006	13.8137	0.824906	0.146288	1.52427	0.0413882	0.0842583	94.4714	Exp01_750C_F60_43	5.5286
	52	83.4228	0.0570422	13.5163	1.04164	0.144289	1.61891	0.0499798	0.14907	92.0372	Exp01_750C_F60_44	7.9628
	54	83.8746	0.0643292	13.2947	0.888065	0.191808	1.49941	0.0456738	0.14131	93.2702	Exp01_750C_F60_46	6.7298
	55	84.0366	0.172576	13.2287	0.929778	0.13164	1.35088	0.058064	0.0916743	92.8286	Exp01_750C_F60_47	7.1714
	56	83.7748	0.117191	13.6777	0.750916	0.109901	1.41206	0.0406959	0.116647	91.9011	Exp01_750C_F60_48	8.0989
	57	84.0067	0.0588453	13.371	0.849999	0.130613	1.38783	0.0482723	0.146739	93.6354	Exp01_750C_F60_49	6.3646
	58	83.7045	0.098322	13.3966	1.05451	0.108241	1.48584	0.0530852	0.098867	91.7394	Exp01_750C_F70_50	8.2606
	59	83.5556	0.102401	13.4885	1.14889	0.101218	1.4477	0.0608812	0.0946562	92.968	Exp01_750C_F70_51	7.032
	60	83.4972	0.230925	13.5209	1.0804	0.101539	1.37083	0.0350464	0.163056	94.4463	Exp01_750C_F70_52	5.5537
	61	83.1328	0.195889	13.7625	1.08916	0.158497	1.49992	0.0291322	0.132044	89.5916	Exp01_750C_F70_53	10.4084
	62	83.2634	0	13.6359	1.3334	0.171375	1.53463	0.0303021	0.0308632	89.1028	Exp01_750C_F70_54	10.8972
	63	82.5398	0.016197	13.7026	1.40374	0.339597	1.81406	0.0442717	0.139618	92.6099	Exp01_750C_F70_55	7.3901
	64	83.1001	0.145298	13.3322	1.39558	0.197949	1.64957	0.0415783	0.137615	88.5077	Exp01_750C_F70_56	11.4923
	65	83.8798	0.0579494	13.1229	1.02972	0.0917623	1.63085	0.0478382	0.139166	91.9768	Exp01_750C_F70_57	8.0232
	66	83.4831	0.072303	13.4402	0.994907	0.143728	1.66769	0.0820678	0.11597	91.1442	Exp01_750C_F70_58	8.8558
	67	83.6034	0.170886	13.1266	1.14907	0.146396	1.67621	0.0546399	0.0725993	91.8742	Exp01_750C_F70_59	8.1258
	68	83.8005	0.0135614	13.3138	1.01258	0.10806	1.48938	0.0615642	0.200407	92.9111	Exp01_750C_F70_60	7.0889
	69	83.979	0.108633	13.0939	1.01062	0.126971	1.51207	0.0584454	0.110242	93.2495	Exp01_750C_F70_61	6.7505
	70	83.7185	0.133369	13.3692	1.05546	0.156153	1.37614	0.0387964	0.152284	93.0499	Exp01_750C_F70_62	6.9501
	71	83.4074	0.117698	13.3532	1.12793	0.182582	1.59441	0.069091	0.147593	90.3157	Exp01_750C_F70_63	9.6843
	73	84.8085	0	12.6082	0.867294	0.104644	1.44103	0.0522159	0.118017	94.2241	Exp01_750C_F70_65	5.7759
	74	80.9663	0.131345	15.1455	0.928414	0.163203	2.16969	0.239936	0.255494	94.4837	Exp01_750C_F70_66	5.5163
	75	83.983	0.228348	12.5088	1.5636	0.235274	1.34585	0.0332658	0.101896	95.2931	Exp01_750C_F70_67	4.7069
	76	84.8197	0.147388	12.2677	1.22205	0.0945613	1.32353	0.0608444	0.0641392	91.052	Exp01_750C_F70_68	8.948
	77	84.6407	0.164488	12.4506	1.26553	0.234907	1.0635	0.0433756	0.136914	94.2927	Exp01_750C_F70_69	5.7073
	78	84.5108	0.053031	13.1254	1.05924	0.106909	0.976998	0.0598054	0.10765	94.4731	Exp01_750C_F70_70	5.5269
	79	83.9094	0.0426784	13.3889	1.05014	0.141445	1.31547	0.0583236	0.0935519	93.9585	Exp01_750C_F70_71	6.0415
	80	83.7646	0.150358	13.2008	1.16027	0.128227	1.31319	0.0899702	0.192507	89.9187	Exp01_750C_F70_72	10.0813
	91	80.5893	0.21489	15.1366	1.3128	0.289663	1.5533	0.54976	0.353616	93.3499	Exp01_750C_F60_83	6.6501
	93	84.2759	0.168701	12.9992	0.882215	0.130845	1.27422	0.101306	0.167528	93.7753	Exp01_750C_F60_85	6.2247
	94	84.7803	0.0474972	12.6624	0.906229	0.166135	1.24323	0.0668323	0.12736	95.1636	Exp01_750C_F60_86	4.8364
	95	83.7234	0.0782822	12.5085	1.49059	0.814614	1.13963	0.0499296	0.195028	95.935	Exp01_750C_F60_87	4.065
	96	84.538	0.0156571	13.1167	0.932894	0.0827442	1.13488	0.0649096	0.114162	96.4418	Exp01_750C_F60_88	3.5582
	97	83.9231	0.172434	13.0793	1.10136	0.145362	1.38371	0.0655598	0.129163	91.9771	Exp01_750C_F60_89	8.0229
	98	83.3436	0.134156	13.3072	0.977237	0.188122	1.53878	0.075097	0.435628	92.2806	Exp01_750C_F60_90	7.7194
	99	83.6143	0.174444	13.1778	1.06805	0.137071	1.41521	0.0899763	0.323072	92.5799	Exp01_750C_F60_91	7.4201
	100	81.076	0.100392	12.1045	3.99803	1.22768	1.30576	0.0283838	0.159148	90.5447	Exp01_750C_F60_92	9.4553
	103	83.7813	0.311001	11.8832	1.33373	0.243022	2.02781	0.119252	0.3006	95.1764	Exp01_850C_F60_03	4.8236
	105	81.502	0.265503	12.542	1.36235	0.284742	2.43352	0.18501	1.42475	96.1571	Exp01_850C_F60_05	3.8429
	106	83.0917	0.360322	12.399	1.50225	0.288584	2.1554	0.0769629	0.125732	91.8624	Exp01_850C_F60_06	8.1376
	107	82.9629	0.196003	12.4061	1.3749	0.27434	2.28084	0.0897414	0.415134	93.8251	Exp01_850C_F60_07	6.1749
	108	82.1641	0.440624	12.6439	1.39189	0.259359	2.4119	0.140358	0.547725	94.1165	Exp01_850C_F60_08	5.8835
	116	81.2671	0.200743	12.2114	1.43909	0.296474	2.48191	0.50775	1.59552	95.8937	Exp01_850C_F70_01	4.1063
	117	81.1261	0.386686	12.4593	1.57173	0.248874	2.4877	0.168622	1.55091	96.0727	Exp01_850C_F70_02	3.9273
	118	81.2937	0.329874	12.5656	1.30376	0.254625	2.56695	0.16385	1.52154	96.6127	Exp01_850C_F70_03	3.3873
	119	81.5083	0.360526	12.5029	1.36263	0.22447	2.37161	0.161124	1.50826	96.1374	Exp01_850C_F70_04	3.8626
	120	81.6227	0.358568	10.8489	2.44336	0.88556	2.37026	0.175838	1.29477	95.7699	Exp01_850C_F70_05	4.2301
	121	81.4531	0.425036	12.335	1.46348	0.316843	2.50882	0.149066	1.34849	95.6624	Exp01_850C_F70_06	4.3376
	122	81.4638	0.259037	12.5505	1.35512	0.347537	2.48092	0.187841	1.35512	95.9322	Exp01_850C_F70_07	4.0678
	123	81.3488	0.39487	12.3742	1.5624	0.343832	2.44776	0.153219	1.37491	96.0063	Exp01_850C_F70_08	3.9937
	124	81.8292	0.211243	12.3427	1.41809	0.369439	2.33197	0.152734	1.34456	95.1983	Exp01_850C_F70_09	4.8017
	125	81.7283	0.268616	12.1655	1.46114	0.349508	2.4564	0.162207	1.4082	94.4471	Exp01_850C_F70_10	5.5529
	126	81.1795	0.282176	12.5715	1.47962	0.369064	2.45553	0.182906	1.47962	95.295	Exp01_850C_F70_11	4.705
	127	81.3272	0.344141	12.5199	1.42129	0.328361	2.37231	0.192188	1.49445	95.6875	Exp01_850C_F70_12	4.3125
	128	81.4291	0.37457	12.2857	1.43747	0.29008	2.55436	0.170428	1.45815	96.6976	Exp01_850C_F70_13	3.3024
	129	80.1358	0.268341	11.8937	2.34523	0.903124	2.69074	0.213479	1.54953	95.5129	Exp01_850C_F70_14	4.4871
	130	81.3171	0.229004	12.5952	1.46771	0.323416	2.55027	0.143127	1.37402	96.0683	Exp01_850C_F70_15	3.9317
	131	82.2216	0.272342	12.5101	1.19011	0.243847	2.38339	0.0248932	1.15356	94.4034	Exp01_850C_F80_01	5.5966
	132	80.6981	0.433001	11.7831	1.94261	0.929694	2.61138	0.116026	1.48615	94.203	Exp01_850C_F80_02	5.797
	133	82.1824	0.270631	12.2591	1.11428	0.313874	2.38975	0.145764	1.32419	96.663	Exp01_850C_F80_03	3.337
	134	81.7956	0.37254	12.3797	1.12159	0.266309	2.40483	0.320993	1.33834	95.6408	Exp01_850C_F80_04	4.3592
	136	81.9818	0.302061	12.3604	1.08909	0.214318	2.3872	0.169014	1.49598	94.2526	Exp01_850C_F80_06	5.7474
	137	81.7247	0.431144	12.3412	1.18887	0.209875	2.55556	0.121815	1.42685	93.9129	Exp01_850C_F80_07	6.0871
	138	81.9423	0.268843	12.5073	1.09955	0.206306	2.4284	0.171814	1.37538	93.0655	Exp01_850C_F80_08	6.9345
	139	81.7242	0.30586	12.2646	1.31569	0.242812	2.54344	0.401346	1.20199	92.7877	Exp01_850C_F80_09	7.2123
	140	81.1554	0.424512	12.6235	1.14582	0.201807	2.50148	0.480241	1.46711	94.7441	Exp01_850C_F80_10	5.2559
	141	81.7692	0.322166	12.6167	1.05578	0.211305	2.39153	0.4123	1.22096	94.0819	Exp01_850C_F80_11	5.9181
	143	82.0252	0.190609	12.4889	1.01429	0.152341	2.51649	0.197992	1.41423	96.1656	Exp01_850C_F80_13	3.8344
	144	82.1479	0.182793	12.425	1.02213	0.162033	2.3978	0.146774	1.51549	96.3384	Exp01_850C_F80_14	3.6616
	145	81.7901	0.226795	12.5534	1.09106	0.180124	2.56278	0.157934	1.43766	95.9896	Exp01_850C_F80_15	4.0104

## Sheet: EPMA (15 kV)
	Session 6 November 2019: Normalised (to 100%, on the volatile-free basis) Data
	Analysis Spot #	SiO2	TiO2	Al2O3	FeOTOT	MnO	MgO	CaO	Na2O	K2O	P2O5	Original Total	File Name	H2O
	1	71.038	0.131	11.368	0.983	0.006	0.182	1.569	1.668	3.009	0	89.954	F60_750_01	10.046
	2	69.55	0.105	11.089	1.493	0.042	0.283	1.616	0.84	2.881	0.057	87.956	F60_750_02	12.044
	3	71.372	0.092	11.25	0.817	0.029	0.142	1.611	1.637	3.101	0	90.051	F60_750_03	9.949
	4	70.917	0.083	11.785	1.161	0.002	0.156	1.565	2.495	2.984	0	91.148	F60_750_04	8.852
	5	74.285	0.119	11.521	1.009	0.002	0.141	1.578	2.847	2.819	0	94.321	F60_750_05	5.679
	6	69.173	0.204	11.951	1.771	0.115	0.853	2.117	2.797	2.736	0	91.717	F60_750_06	8.283
	7	72.729	0.108	11.562	1.059	0.065	0.159	1.518	2.763	2.974	0	92.937	F60_750_07	7.063
	8	72.436	0.1	11.933	0.995	0	0.159	1.473	2.899	2.997	0	92.992	F60_750_08	7.008
	9	69.961	0.108	11.324	1.034	0.051	0.204	1.599	2.28	2.854	0	89.415	F60_750_09	10.585
	10	71.452	0.107	11.576	1.199	0.02	0.056	1.584	2.386	2.957	0	91.337	F60_750_10	8.663
	11	72.379	0.109	11.563	1.174	0.042	0.152	1.561	2.016	2.958	0	91.954	F60_750_11	8.046
	12	71.609	0.135	11.637	0.779	0	0.205	1.504	1.631	3.008	0	90.508	F60_750_12	9.492
	1	71.383	0.09	11.66	1.255	0.032	0.213	1.494	1.907	3.152	0.114	91.3	F70_750_01	8.7
	2	70.999	0.125	11.378	1.191	0	0.219	1.479	1.731	3.014	0	90.136	F70_750_02	9.864
	3	68.704	0.111	11.135	1.625	0.05	0.614	1.481	1.697	3.058	0	88.475	F70_750_03	11.525
	4	70.809	0.095	11.543	1.217	0	0.086	1.466	1.711	3.132	0	90.059	F70_750_04	9.941
	5	72.31	0.107	10.8	0.949	0.041	0.229	1.339	0.99	2.999	0.115	89.879	F70_750_05	10.121
	6	68.623	0.114	11.493	1.064	0	0.14	1.523	1.676	3.22	0	87.853	F70_750_06	12.147
